# Supplementary material
Source: PubMed Central journal article supplement (PMC5076832)

## Supplemental Information

### Supplemental Figure 1. The kinase activity of PINK1 is not required for BNIP3-PINK1 interaction

HEK293 cells expressing myc-BNIP3 and PINK1-flag variants, including wild-type and two kinase dead mutants (G309D and D384N) in various combination (indicated on the top of panels) followed by 20  $\mu$ M CCCP treatment for 2 hours. Right panels: Lysates were immunoprecipitated with an anti-flag tag antibody (to precipitate PINK1) followed by immunoblotted with antibodies against BNIP3 or flag-tag (to detect PINK1). Left panels: Cell lysates were immunoblotted with an anti-BNIP3 antibody (BNIP3) or anti-PINK1 (PINK1) are shown as the input controls.  $\beta$ -tubulin is shown as loading controls.

### Supplemental Figure 2. BNIP3 promotes mitochondria localization of PINK1

HeLa cells co-expressing PINK1-flag and DsRed-mito were transfected with either myc-tagged BNIP3 WT or  $\Delta$ TM followed by immunostaining with antibodies against myc-tag (to detect BNIP3 WT or  $\Delta$ TM, blue) and flag-tag (to detect PINK1, green). Mitochondria were labeled by expressing DsRed-mito (red). The cell nuclei were stained with DAPI (gray). Colocalization of BNIP3 variants, mitochondria and PINK1 is also shown (Merge). Cells treated with 20  $\mu$ M CCCP for 2 hours was used as a positive control (top panel). Bar = 10  $\mu$ m. Note that colocalization of mitochondria and PINK1 is remarkably enhanced in cells transfected with BNIP3 WT comparing to that in cells either transfected with control plasmid or expressing BNIP3  $\Delta$ TM.

### Supplemental Figure 3. BNIP3 prevents mitochondrial clustering in DA neurons caused by loss of PINK1

Whole-mount immunostaining of dorsolateral protocerebral posterior DA neurons in 5-day-old wild-type (WT) or PINK1<sup>B9</sup> (*PINK1* null) null adult flies expressing either

*th-gal4* and mito-GFP (*TH*) or *th-gal4*, mito-GFP and BNIP3 (*TH>BINP3*) were immunostained with either an anti-GFP antibody (to detect mitochondria, mito-GFP, green) or an anti-TH antibody (to label DA neurons, red). Colocalization of mitochondria and DA neurons are shown in merged pictures (Merge). An amplified mitochondrial view is shown (right panels, Zoom). Bar=10  $\mu$ m. Note that mitochondrial fragmentation is observed in neurons expressing BNIP3.

# Zhang et al, Suppl Figure 1

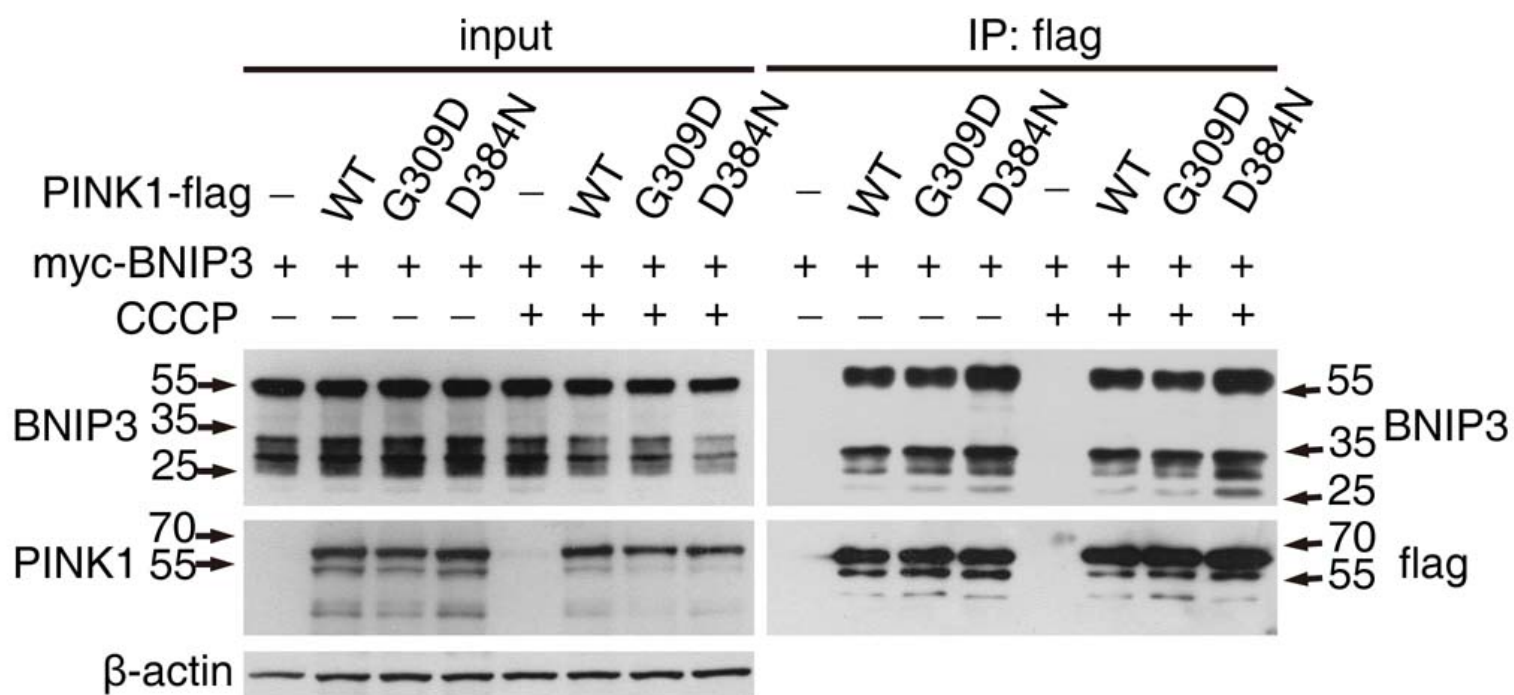

# Zhang et al, Suppl Figure 2

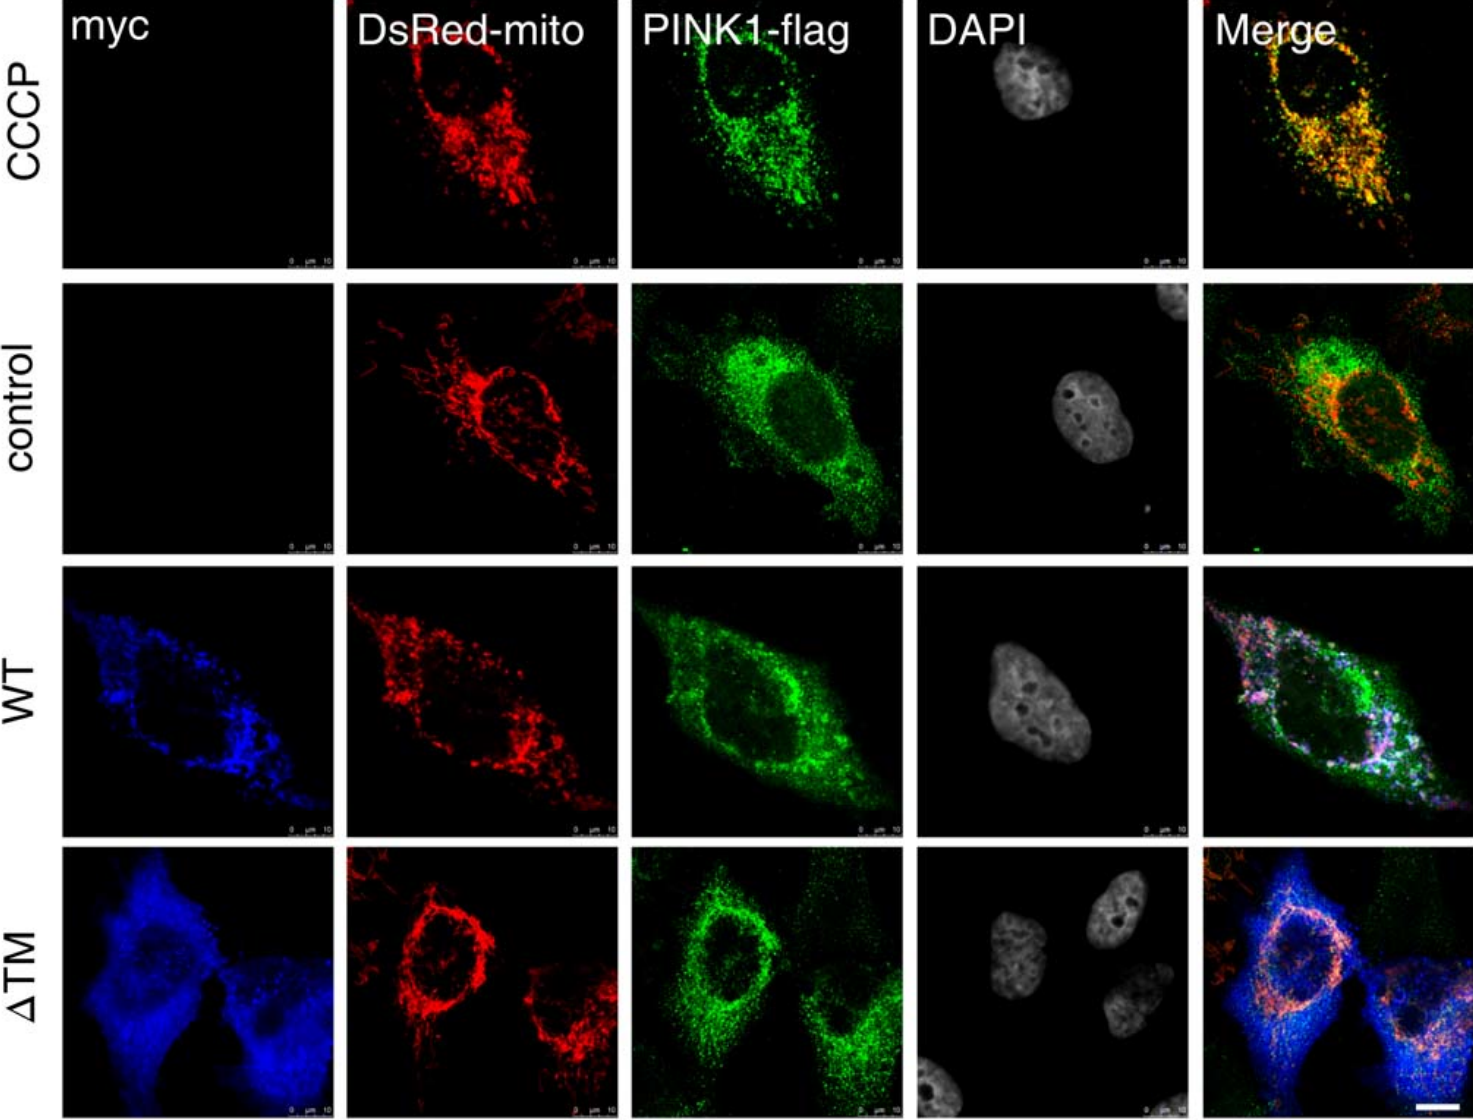

# Zhang et al, Suppl Figure 3

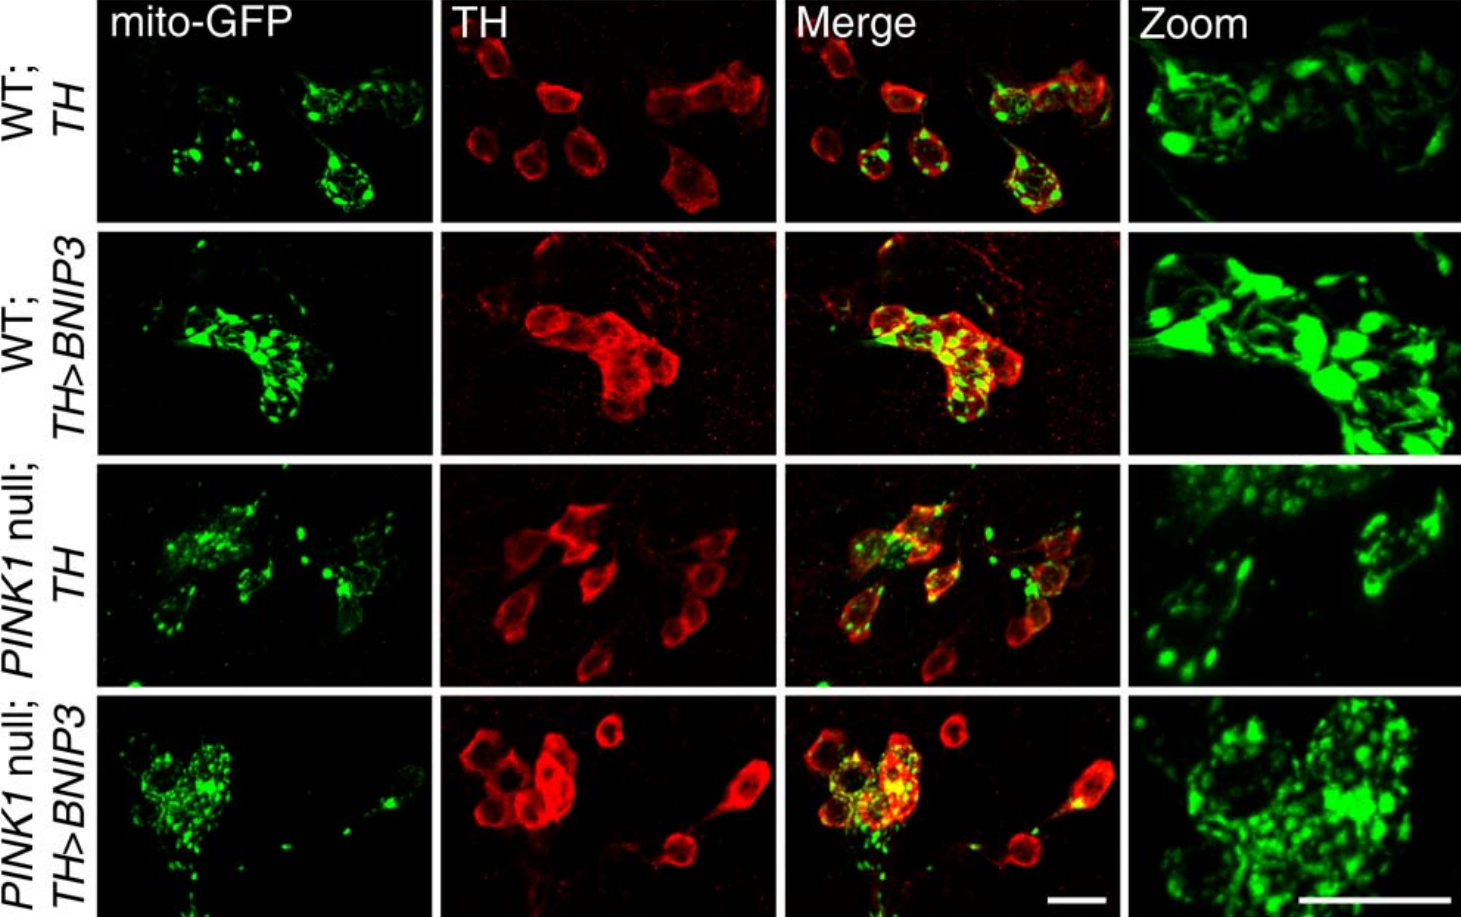

Supplement: 10.1074_M116.733410_jbc.M116.733410-1.pdf [file 10.1074_M116.733410_jbc.M116.733410-1.pdf]
